# Supplementary material
Source: PubMed Central journal article supplement (PMC1323183)

Jurkat

J14/  
SLP-76WT

J14/  
SLP-76 $\Delta$ 185-194

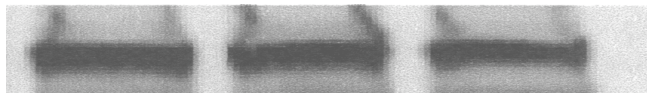

WB: PLC-1

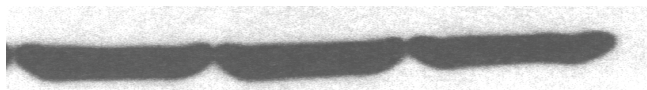

WB: actin

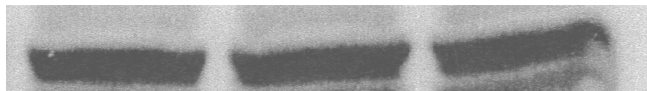

WB: Itk

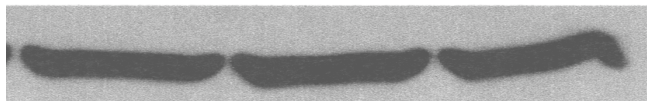

WB: actin

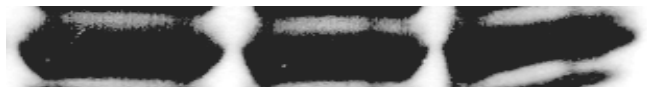

WB: Lck

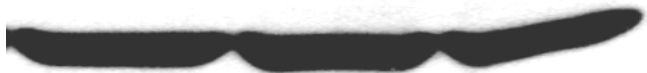

WB: actin

Supplement: pnas_0509176102_1.pdf [file pnas_0509176102_1.pdf]

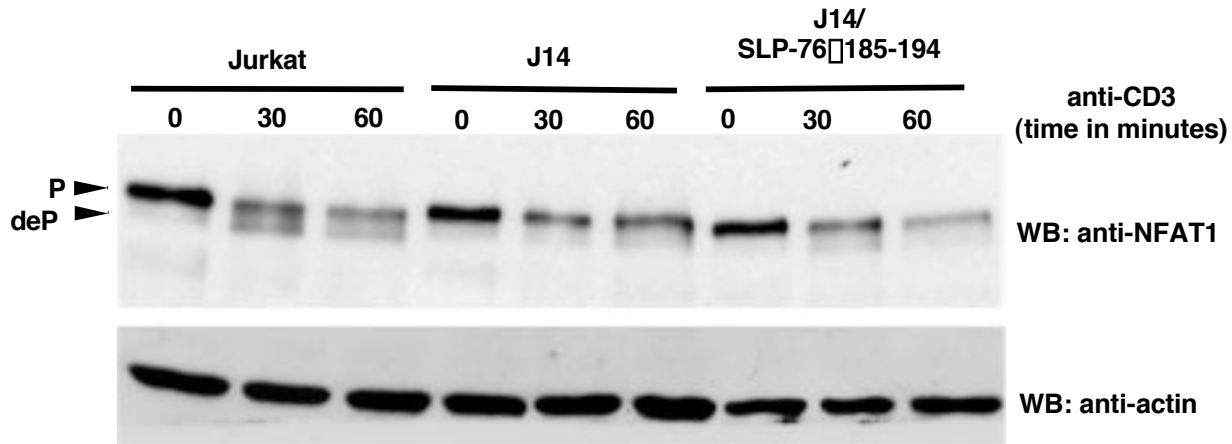

Supplement: pnas_0509176102_2.pdf [file pnas_0509176102_2.pdf]

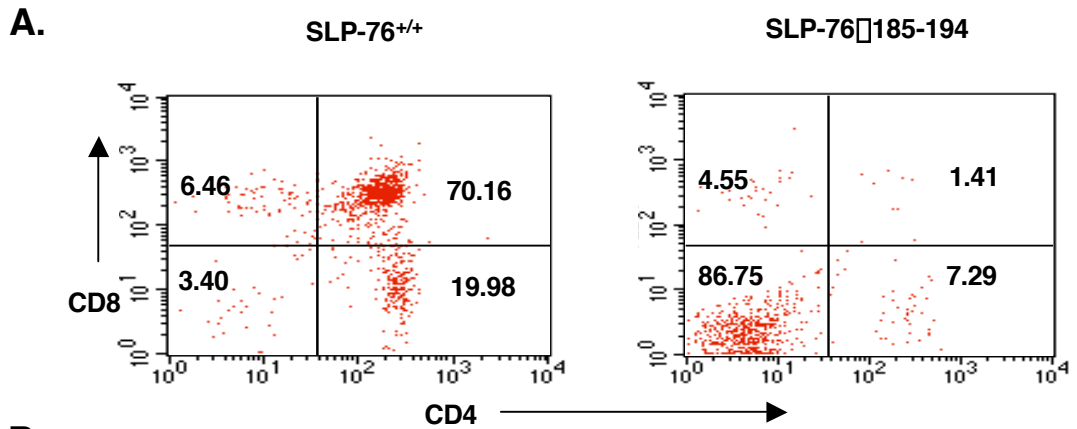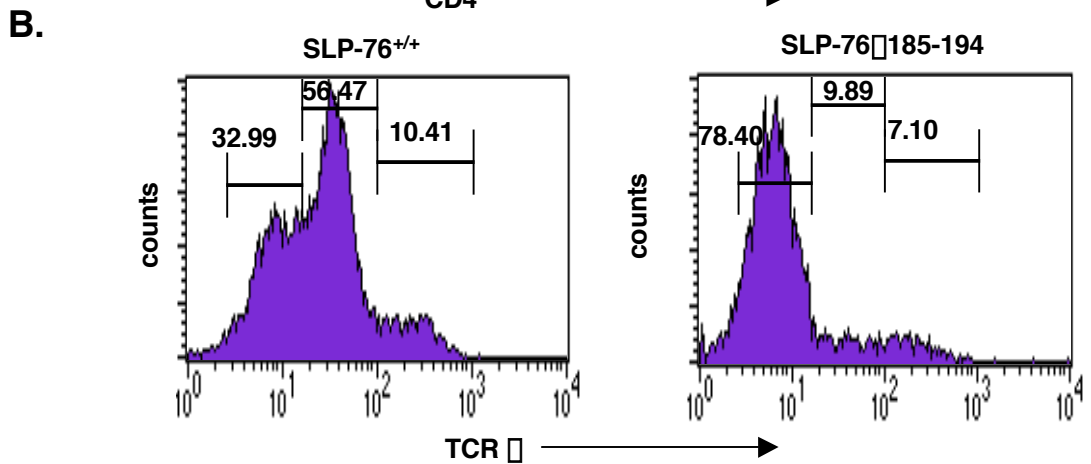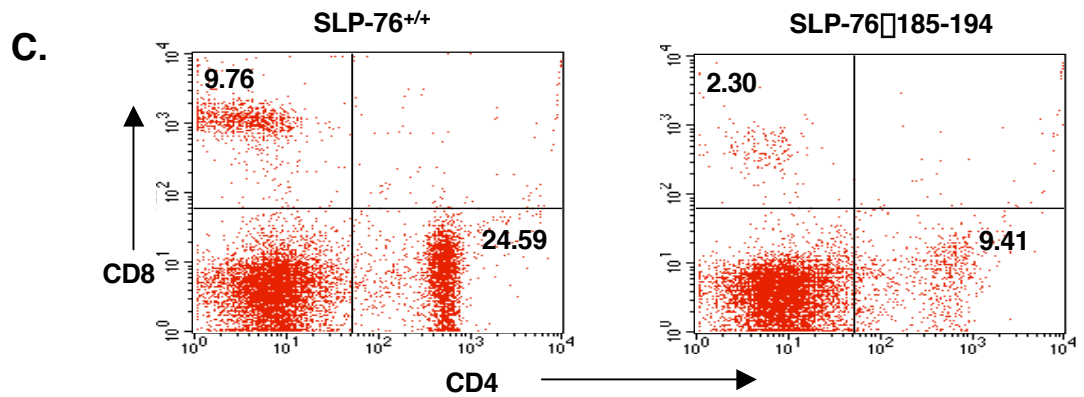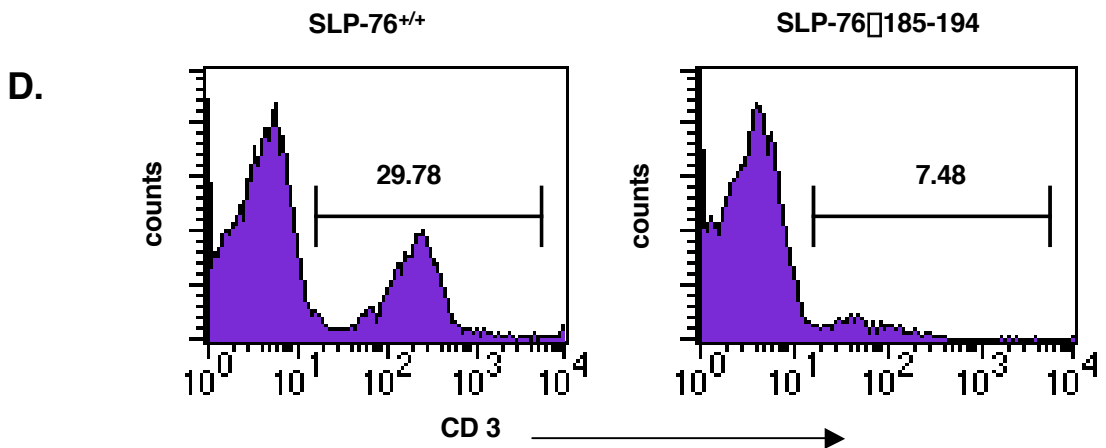

Supplement: pnas_0509176102_3.pdf [file pnas_0509176102_3.pdf]

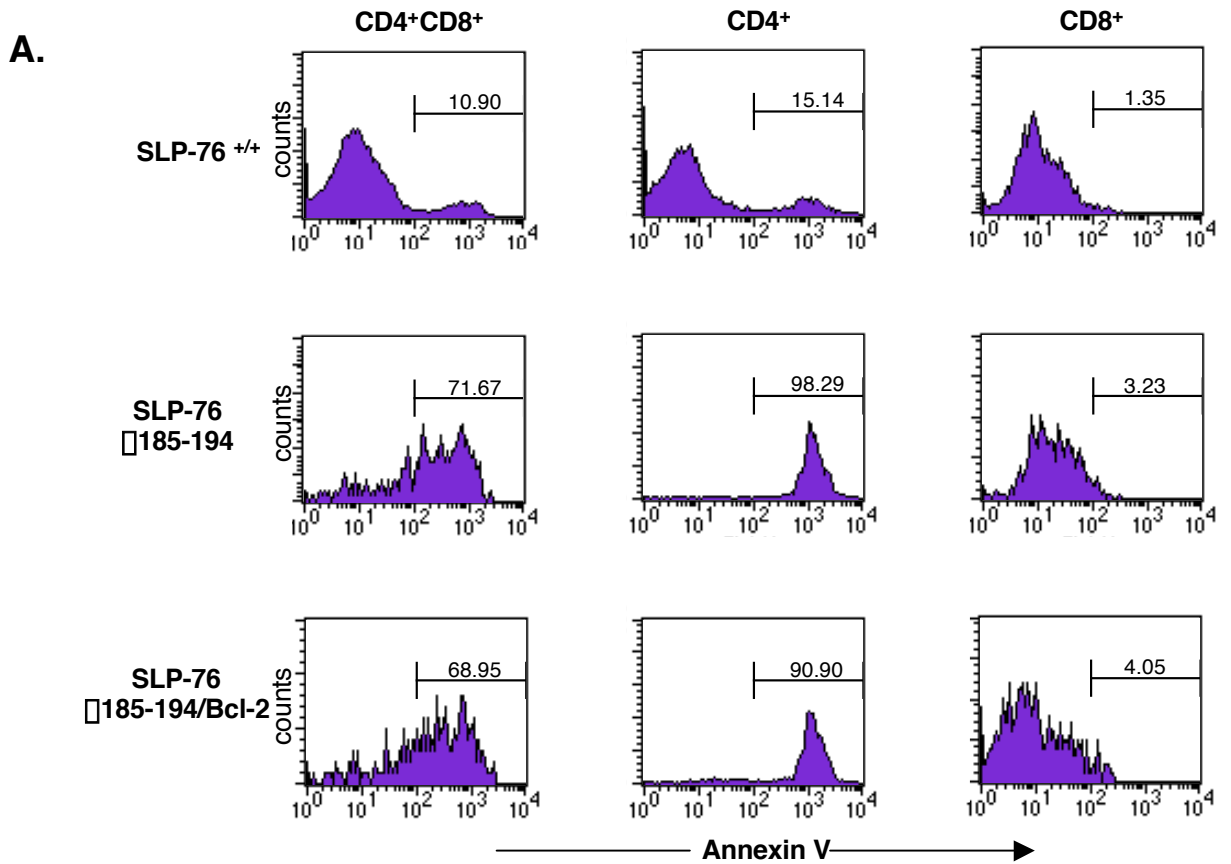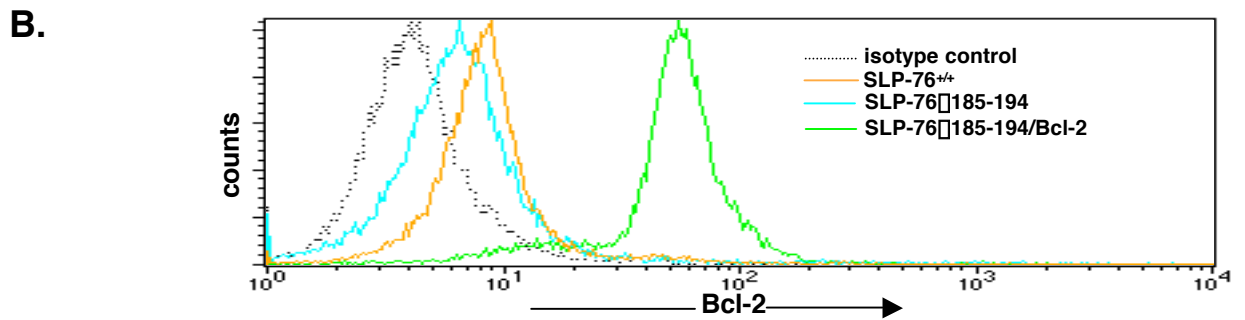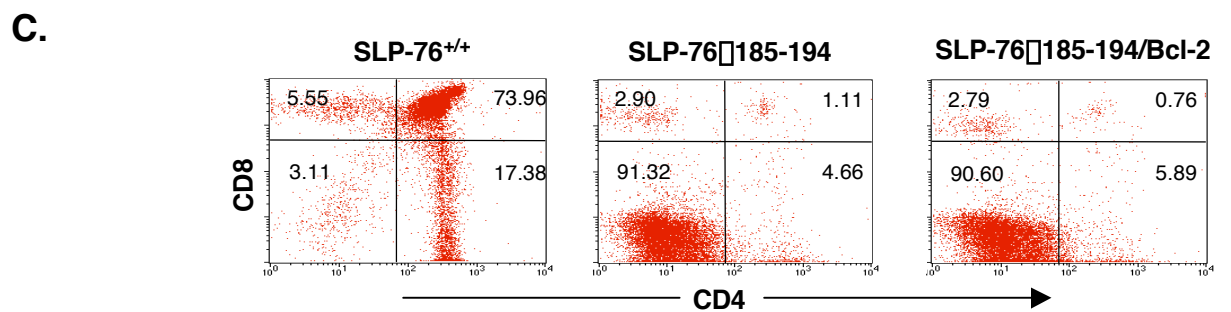

Supplement: pnas_0509176102_4.pdf [file pnas_0509176102_4.pdf]
